# Supplementary material for: Brief Developmental Exposure to Fluoxetine Causes Life-Long Alteration of the Brain Transcriptome in Zebrafish
Source: Front Endocrinol (Lausanne). 2022 Apr 28;13:847322. doi: 10.3389/fendo.2022.847322 (PMC9097470; doi:10.3389/fendo.2022.847322)
Supplement: Supplementary file 5 [file Table_1.xlsx]

## Sheet: Supp 1
Supplementary table 1. Life-long effect of developmental exposure to fluoxetine on the cellular pathways in the unstressed condition.
Canonical pathway	Unstressed*
	L	Hyp	Tel
Agrin Interactions at Neuromuscular Junction	1.93	1.72	3.6
Clathrin-mediated Endocytosis Signaling	2.07	2.1	1.7
ILK Signaling	2.88	2.89	2.88
Paxillin Signaling	5.38	3.06	5.38
Glucocorticoid Receptor Signaling	2.43	1.55	2.43
Aldosterone Signaling in Epithelial Cells	1.97	2.02	1.97
April Mediated Signaling	1.62	1.5	1.62
B Cell Activating Factor Signaling	1.62	1.5	1.62
IL-17A Signaling in Airway Cells	1.7	1.7	1.7
Myc Mediated Apoptosis Signaling	2.15	1.89	2.15
Sertoli Cell-Sertoli Cell Junction Signaling	2.9	1.64	2.9
NRF2-mediated Oxidative Stress Response	3.15	2.33	3.15
HIF1α Signaling	3.6	1.67	3.6
IL-22 Signaling	4.3	1.5	4.3
SAPK/JNK Signaling	4.34	1.36	4.34
14-3-3-mediated Signaling		2.04	4.2
AMPK Signaling		1.44	1.76
Apelin Endothelial Signaling Pathway		1.51	5.55
Apelin Pancreas Signaling Pathway		1.91	1.73
Axonal Guidance Signaling		3.49	5.03
Calcium Signaling		2.57	2.98
Cardiac Hypertrophy Signaling		1.71	6.61
Cardiac Hypertrophy Signaling (Enhanced)		1.67	4.26
Cdc42 Signaling		1.59	2.65
Cholecystokinin/Gastrin-mediated Signaling		2.09	5.7
CREB Signaling in Neurons		1.34	8.89
CXCR4 Signaling		1.39	7.42
Dopamine-DARPP32 Feedback in cAMP Signaling		1.31	2.22
Epithelial Adherens Junction Signaling		1.56	7.02
ERK/MAPK Signaling		1.42	3.97
Germ Cell-Sertoli Cell Junction Signaling		3.34	5.12
Glioblastoma Multiforme Signaling		1.48	2.16
Glioma Invasiveness Signaling		2.02	3.76
GNRH Signaling		2	8.74
Gαq Signaling		1.62	3.86
Hypoxia Signaling in the Cardiovascular System		2.49	2.1
IGF-1 Signaling		2.81	2.4
IL-15 Production		1.89	2.17
IL-8 Signaling		2.15	5.07
Integrin Signaling		3.44	6
Leukocyte Extravasation Signaling		1.42	1.53
Macropinocytosis Signaling		2.74	4.31
Mitochondrial Dysfunction		1.58	2.77
mTOR Signaling		1.78	9.12
Neuropathic Pain Signaling In Dorsal Horn Neurons		2.33	3.91
NF-κB Signaling		1.7	1.98
Oxidative Phosphorylation		1.45	1.71
p70S6K Signaling		1.31	1.67
PAK Signaling		1.76	4.58
Phospholipase C Signaling		1.34	4.15
Protein Kinase A Signaling		3.14	3.72
PTEN Signaling		2.44	4.53
Rac Signaling		2.69	7.06
Regulation of Actin-based Motility by Rho		2.65	3.58
Remodeling of Epithelial Adherens Junctions		1.5	3.13
Role of NFAT in Cardiac Hypertrophy		3.11	7.29
Semaphorin Signaling in Neurons		3.32	3.18
Signaling by Rho Family GTPases		3.31	4.91
Sperm Motility		2.01	2.28
STAT3 Pathway		1.67	3.9
Synaptogenesis Signaling Pathway		3.33	7.37
Virus Entry via Endocytic Pathways		1.96	3.44
*values are shown in -log(p-value); p=0.05 equals to 1.3 in the negative logaritmic scale
Only significant data (p≤0.05) are shown in the blue gradient. Gray represent non-significant data. L: larvae head; Hyp: hypothalamus; Tel: telencephalon.

## Sheet: Supp 2
Supplementary table 2. Life-long effect of developmental exposure to fluoxetine on the cellular pathways in the stressed condition.
Canonical pathways	Stressed
	L	Hyp	Tel
Androgen Signaling	1.58	1.32
Aldosterone Signaling in Epithelial Cells		1.53	6.42
BAG2 Signaling Pathway		2.06	1.31
Circadian Rhythm Signaling		4.67	2.51
NRF2-mediated Oxidative Stress Response		2.56	2.59
Oxidative Phosphorylation		1.42	1.62
Sirtuin Signaling Pathway		2.91	2.28
TCA Cycle II (Eukaryotic)		1.52	1.57
Unfolded protein response		1.76	1.38
*values are shown in -log(p-value); p=0.05 equals to 1.3 in the negative logaritmic scale
Only significant data (p≤0.05) are shown in the blue gradient. Gray represent non-significant data. L: larvae head; Hyp: hypothalamus; Tel: telencephalon.

## Sheet: Supp 3
Supplementary Table 3.Life-long effect of developmental exposure to fluoxetine on the cellular pathways in a single tissue sample in the unstressed condition
Canonical pathway	Unstressed*
	L	Hyp	Tel
Apelin Cardiac Fibroblast Signaling Pathway		1.47
Caveolar-mediated Endocytosis Signaling		1.79
Choline Biosynthesis III		1.36
D-myo-inositol (1,4,5)-Trisphosphate Biosynthesis		1.53
Ephrin A Signaling		1.55
Glycolysis I		2.72
GP6 Signaling Pathway		2.08
HIPPO signaling		2.05
Ketogenesis		2.22
Mevalonate Pathway I		1.36
Nitric Oxide Signaling in the Cardiovascular System		1.74
Phagosome Formation		2
Phagosome Maturation		2.24
RhoA Signaling		1.79
3-phosphoinositide Biosynthesis			2.65
3-phosphoinositide Degradation			1.97
4-1BB Signaling in T Lymphocytes			1.59
Actin Cytoskeleton Signaling			3.71
Actin Nucleation by ARP-WASP Complex			6.17
Acute Myeloid Leukemia Signaling			3.43
Adrenomedullin signaling pathway			3.23
Androgen Signaling			3.26
Angiopoietin Signaling			1.7
Antioxidant Action of Vitamin C			1.47
Antiproliferative Role of Somatostatin Receptor 2			2.67
Apelin Adipocyte Signaling Pathway			2.46
Apelin Cardiomyocyte Signaling Pathway			1.68
Apelin Muscle Signaling Pathway			1.39
Apoptosis Signaling			1.56
Arginine Degradation I (Arginase Pathway)			1.89
B Cell Receptor Signaling			4.68
BMP signaling pathway			2.49
Breast Cancer Regulation by Stathmin1			2.43
cAMP-mediated signaling			3.48
Cancer Drug Resistance By Drug Efflux			1.96
Cardiac β-adrenergic Signaling			1.67
CCR3 Signaling in Eosinophils			2.36
CCR5 Signaling in Macrophages			2.15
CDK5 Signaling			3.47
Ceramide Signaling			1.59
Chemokine Signaling			3.43
Chronic Myeloid Leukemia Signaling			2.73
Circadian Rhythm Signaling			1.9
CNTF Signaling			3.49
Colorectal Cancer Metastasis Signaling			3.02
Corticotropin Releasing Hormone Signaling			2.95
D-myo-inositol (1,4,5,6)-Tetrakisphosphate Biosynthesis			2.24
D-myo-inositol (3,4,5,6)-tetrakisphosphate Biosynthesis			2.24
D-myo-inositol-5-phosphate Metabolism			2.49
EGF Signaling			3.29
EIF2 Signaling			15.4
Endocannabinoid Cancer Inhibition Pathway			1.31
Endocannabinoid Developing Neuron Pathway			4.93
Endocannabinoid Neuronal Synapse Pathway			2.49
Endometrial Cancer Signaling			2.97
Endothelin-1 Signaling			2.28
Ephrin B Signaling			3.12
Ephrin Receptor Signaling			7.32
ErbB Signaling			3.73
ErbB2-ErbB3 Signaling			3.47
ErbB4 Signaling			4.15
ERK5 Signaling			2
Erythropoietin Signaling			4.39
Estrogen Receptor Signaling			2.81
Estrogen-Dependent Breast Cancer Signaling			3.76
FAK Signaling			4.05
FAT10 Cancer Signaling Pathway			1.36
Fc Epsilon RI Signaling			2.84
Fcγ Receptor-mediated Phagocytosis in Macrophages and Monocytes			3.15
FcγRIIB Signaling in B Lymphocytes			4.35
FGF Signaling			4.09
FLT3 Signaling in Hematopoietic Progenitor Cells			6.17
fMLP Signaling in Neutrophils			4.03
G Beta Gamma Signaling			4.83
GABA Receptor Signaling			4.36
Gap Junction Signaling			3.01
GDNF Family Ligand-Receptor Interactions			4.46
Glioma Signaling			2.49
Glutamate Receptor Signaling			1.32
GM-CSF Signaling			4.46
GPCR-Mediated Nutrient Sensing in Enteroendocrine Cells			2.07
G-Protein Coupled Receptor Signaling			6.34
Growth Hormone Signaling			3.93
Gustation Pathway			1.9
Gα12/13 Signaling			4.06
Gαi Signaling			2.06
Gαs Signaling			3.73
HER-2 Signaling in Breast Cancer			2.35
Hereditary Breast Cancer Signaling			1.71
HGF Signaling			6.23
HMGB1 Signaling			1.45
Huntington's Disease Signaling			2.84
IL-15 Signaling			2.27
IL-17 Signaling			2.56
IL-2 Signaling			2.52
IL-3 Signaling			4.39
IL-6 Signaling			1.79
IL-9 Signaling			1.9
Inhibition of Angiogenesis by TSP1			1.73
Insulin Receptor Signaling			2.62
JAK/Stat Signaling			3.43
L-carnitine Biosynthesis			1.89
Leptin Signaling in Obesity			1.4
LPS-stimulated MAPK Signaling			4.85
Melanocyte Development and Pigmentation Signaling			5.79
Melanoma Signaling			1.92
Melatonin Signaling			1.9
Molecular Mechanisms of Cancer			3.38
Mouse Embryonic Stem Cell Pluripotency			2.27
Natural Killer Cell Signaling			2.4
Neuregulin Signaling			2.43
Neurotrophin/TRK Signaling			4.42
NF-κB Activation by Viruses			4.89
NGF Signaling			5.72
nNOS Signaling in Neurons			1.73
Non-Small Cell Lung Cancer Signaling			2.58
Oncostatin M Signaling			2.87
Opioid Signaling Pathway			8.5
P2Y Purigenic Receptor Signaling Pathway			3.23
Pancreatic Adenocarcinoma Signaling			2.11
PDGF Signaling			3.58
PEDF Signaling			3.43
PFKFB4 Signaling Pathway			1.53
PI3K Signaling in B Lymphocytes			2.81
PKCθ Signaling in T Lymphocytes			4.19
PPAR Signaling			1.71
PPARα/RXRα Activation			3.23
Production of Nitric Oxide and Reactive Oxygen Species in Macrophages			1.66
Prolactin Signaling			3.89
Prostate Cancer Signaling			3.05
RANK Signaling in Osteoclasts			2.61
RAR Activation			2.26
Reelin Signaling in Neurons			1.49
Regulation of Cellular Mechanics by Calpain Protease			3.31
Regulation of eIF4 and p70S6K Signaling			6.42
Regulation of IL-2 Expression in Activated and Anergic T Lymphocytes			4.34
Regulation of the Epithelial-Mesenchymal Transition Pathway			1.99
Relaxin Signaling			3.3
Renal Cell Carcinoma Signaling			4.22
Renin-Angiotensin Signaling			5.72
RhoGDI Signaling			2.97
Role of JAK family kinases in IL-6-type Cytokine Signaling			2.42
Role of JAK1 and JAK3 in γc Cytokine Signaling			2.67
Role of MAPK Signaling in the Pathogenesis of Influenza			2.73
Role of NANOG in Mammalian Embryonic Stem Cell Pluripotency			1.47
Role of NFAT in Regulation of the Immune Response			2.5
Role of Tissue Factor in Cancer			4.47
Small Cell Lung Cancer Signaling			1.35
Sphingosine-1-phosphate Signaling			1.55
SPINK1 General Cancer Pathway			2.21
Sumoylation Pathway			1.59
Superpathway of Inositol Phosphate Compounds			2.09
Synaptic Long Term Depression			3.74
Synaptic Long Term Potentiation			5.62
Systemic Lupus Erythematosus In T Cell Signaling Pathway			1.59
T Cell Exhaustion Signaling Pathway			1.71
T Cell Receptor Signaling			2.65
Tec Kinase Signaling			3.01
Telomerase Signaling			1.4
TGF-β Signaling			3.6
Thrombin Signaling			5.73
Thrombopoietin Signaling			4.15
Thyroid Cancer Signaling			1.92
tRNA Splicing			1.9
Type II Diabetes Mellitus Signaling			2.41
UVA-Induced MAPK Signaling			3.88
UVB-Induced MAPK Signaling			2.67
UVC-Induced MAPK Signaling			4.2
VEGF Family Ligand-Receptor Interactions			2.86
VEGF Signaling			3.03
White Adipose Tissue Browning Pathway			3.34
Wnt/Ca+ pathway			1.44
Xenobiotic Metabolism Signaling			1.99
α-Adrenergic Signaling			3.02
*values are shown in -log(p-value); p=0.05 equals to 1.3 in the negative logaritmic scale
Only significant data (p≤0.05) are shown in the blue gradient. Gray represent non-significant data. L: larvae head; Hyp: hypothalamus; Tel: telencephalon.

## Sheet: Supp 4
Supplementary Table 4. Life-long effect of developmental exposure to fluoxetine on the cellular pathways in a single tissue sample in the stressed condition.
Canonical pathways	Stressed*
	L	Hyp	Tel
Adenine and Adenosine Salvage VI		1.46
Cancer Drug Resistance By Drug Efflux		1.35
Chemokine Signaling		1.54
Cholecystokinin/Gastrin-mediated Signaling		1.69
Coagulation System		1.67
CXCR4 Signaling		1.31
D-myo-inositol (1,4,5,6)-Tetrakisphosphate Biosynthesis		1.32
D-myo-inositol (3,4,5,6)-tetrakisphosphate Biosynthesis		1.32
Endothelin-1 Signaling		1.43
eNOS Signaling		1.69
Ephrin B Signaling		1.68
Ephrin Receptor Signaling		1.41
ERK5 Signaling		2.57
Folate Polyglutamylation		2.16
Glucocorticoid Receptor Signaling		1.49
Glycogen Degradation II		2.16
Glycogen Degradation III		1.79
GNRH Signaling		1.58
HER-2 Signaling in Breast Cancer		1.39
JAK/Stat Signaling		1.45
NAD Salvage Pathway II		1.53
Prolactin Signaling		1.36
RAR Activation		1.35
Relaxin Signaling		1.63
Retinol Biosynthesis		1.94
Role of Tissue Factor in Cancer		3.06
Superoxide Radicals Degradation		1.65
Thrombopoietin Signaling		1.8
UVA-Induced MAPK Signaling		1.8
VEGF Family Ligand-Receptor Interactions		1.42
Vitamin-C Transport		1.53
γ-glutamyl Cycle		1.65
Antioxidant Action of Vitamin C			1.6
Apelin Cardiomyocyte Signaling Pathway			1.85
Biotin-carboxyl Carrier Protein Assembly			2.01
Calcium Signaling			1.98
Cardiac β-adrenergic Signaling			1.32
Cellular Effects of Sildenafil (Viagra)			2.1
Cysteine Biosynthesis III (mammalia)			2.26
Dopamine Degradation			1.82
Dopamine-DARPP32 Feedback in cAMP Signaling			1.65
Fatty Acid α-oxidation			1.53
Glycolysis I			1.35
GP6 Signaling Pathway			2.11
Intrinsic Prothrombin Activation Pathway			1.66
Leucine Degradation I			1.36
Melatonin Signaling			1.3
Methionine Degradation I (to Homocysteine)			1.63
Mitochondrial Dysfunction			1.61
Neuropathic Pain Signaling In Dorsal Horn Neurons			1.59
Nitric Oxide Signaling in the Cardiovascular System			1.68
Noradrenaline and Adrenaline Degradation			1.44
Proline Degradation			2.01
Protein Ubiquitination Pathway			1.89
Putrescine Degradation III			2.26
S-adenosyl-L-methionine Biosynthesis			3.7
Salvage Pathways of Pyrimidine Ribonucleotides			1.39
Sucrose Degradation V (Mammalian)			2.23
Acetyl-CoA Biosynthesis I (Pyruvate Dehydrogenase Complex)	1.85
Cardiomyocyte Differentiation via BMP Receptors	1.69
Factors Promoting Cardiogenesis in Vertebrates	1.41
Nucleotide Excision Repair Pathway	1.93
Pregnenolone Biosynthesis	1.39
Pyrimidine Ribonucleotides De Novo Biosynthesis	2.08
Pyrimidine Ribonucleotides Interconversion	2.08
Reelin Signaling in Neurons	1.74
Serotonin Receptor Signaling	1.53
Sphingomyelin Metabolism	1.51
Synaptogenesis Signaling Pathway	1.81
Triacylglycerol Biosynthesis	1.36
Wnt/Ca+ pathway	2.07
*values are shown in -log(p-value); p=0.05 equals to 1.3 in the negative logaritmic scale
Only significant data (p≤0.05) are shown in the blue gradient. Gray represent non-significant data. L: larvae head; Hyp: hypothalamus; Tel: telencephalon.

## Sheet: Supp 5
Supplementary table 5. Genes that were dysregulated life-longly upon developmental exposure to fluoxetine in the unstressed condition
Gene symbol		Unstressed			Gene ontology: Biological process*
Homo sapiens	Danio rerio	L	Hyp	Tel
ALCAM	alcama				neuron migration, axonogenesis, neuropeptide hormone activity, circadian rhythm regulation
CCK	cckb
ITGB1	itgb1b
CTNNA1	ctnna1
ABHD17A	abhd17aa
RAB5A	rab5ab
PASD1	npas2
GDPD1	gdpd1				lipid and cholesterol metabolic process
HIGD1B	higd1a
MLC1	mlc1
PKD1L3	pkd1a
ITGAV	itgav
PARP10	si:ch1073-296d18.1				regulation of chromatin assembly, cell division, and transcription
DYNC1I2	dync1i2b
SPECC1L	zbtb37
PURB	purbb
LARP4	larp4aa
ZBTB37	specc1lb
PIGP	pigp				biosynthesis process
ALDH1L2	aldh1l2
SLC9A3R1	slc9a3r1b				negative regulation of intercellular signaling
RASL11B	rasl11b
RILPL2	rilpl2				cell morphogenesis
NOXO1	noxo1a
FAM118B	fam118b
MFSD14B	mfsd14bb				transmembrane transport
C2orf83	slc19a2
SLC7A13	si:ch73-352p4.8
C20orf173	st3gal8				protein binding+
CRELD2	creld2
PTRHD1	ptrhd1
Red: upregulation, Green: downregulation. L: larvae, Tel: telencephalon, Hyp: hypothalamus.
(+) shows GO molecular function instead of GO: Biological process due to no annotation
*Gene ontology is associated with Homo sapiens orthologs.

## Sheet: Supp 6
Supplementary table 6. Genes that were dysregulated life-longly upon developmental exposure to fluoxetine in the stressed condition
Gene symbol		Stressed			Gene ontology: Biological process*
Homo sapiens	Danio rerio	L	Hyp	Tel
ARNTL2	arntl2				regulation of circadian rhythm
ARNTL	arntl1a
PASD1	npas2
BHLHE41	bhlhe41
CIART	ciarta
SFPQ	sfpq
IGSF9B	igsf9bb				nervous system, hippocampus, cerebral cortex, and pituitary gland development, response to steroid hormones
NME1	nme2b.2
MYLIP	mylipb
DIXDC1	dixdc1b
KDM1A	kdm1a
IFRD1	ifrd1
FAM107B	fam107b
HSPD1	hspd1
SRRT	srrt
BATF2	fosaa				transcription factor activity, sequence-specific DNA binding, negative regulation of transcription
BHLHE41	bhlhe41
HSF2	hsf2
ZHX3	si:ch211-232b12.5
ERCC6	ercc6
HSD11B2	hsd11b2				glucocorticoid biosynthetic process, response to glucocorticoid
ABCA7	abca7				regulation of lipid and cholesterol synthesis, regulation of mitochondrial transport, translation, and respiratory chain
TSPO2	tspo
PTGES2	ptgesl
LCN12	ptgdsb.1
NDUFAF4	ndufaf4
CHCHD4	chchd4a
MRPL57	mrpl57
SURF1	surf1
TIMM50	timm50
TOMM40	tomm40
TRIT1	trit1
UQCC1	uqcc1
SLC7A13	si:ch73-352p4.8				regulation of transmembrane transport
SMU1	smu1b
SLC22A8	slc22a6l
KCNJ5	kcnj5
OSGIN2	osgin2
CARF	carf				calcium channel regulator activity
ATP2A3	atp2a3
CRISP1	glipr1b
AAMP	aamp				cell differentiation, organs development, vasculogenesis
AIMP1	aimp1b
F10	f10
OSR1	osr1
PAQR7	paqr7b
HCCS	hccsa.1
TIPARP	tiparp
P3H3	p3h3				regulation of mitosis, cell cycle arrest
ERF	erfl3
PPP1R1C	ppp1r1c
TBRG4	tbrg4
CDV3	cdv3
CAB39	cab39
FMNL2	fmnl2a
UBXN6	ubxn6
C9orf72	zgc:100846
NEIL1	neil1				regulation of DNA damage checkpoint
WDR76	wdr76
RAD54L2	rad54l2
TUT7	tut7
ECSIT	ecsit				innate immune response
SDHAF4	sdhaf4
GRN	grnb				protein binding and protein folding
SERPINB8	serpinb14
FAM43B	fam43b
HSPE1	hspe1
DNAJC4	dnajc4
LONRF1	lonrf1l
RPIA	rpia				ATP biosynthesis process
MT-ATP6	mt-atp6
GYG1	gyg1b
RABEP2	rabep2				signal transduction
GUCY1A2	GUCY1A2*
CBR3	zgc:110339				oxidation-reduction process
SELENOW	selenow1
TPMT	tpmt.1				methylation
EPHX1	ephx1				xenobiotic metabolic process
Red: upregulation, Green: downregulation. L: larvae, Tel: telencephalon, Hyp: hypothalamus.
*Gene ontology is associated with Homo sapiens orthologs.

## Sheet: Supp 7
Supplementary table 7. Life-long dysregulation of genes associated with depressive disorders in multiple tissue samples upon developmental exposure to fluoxetine in zebrafish
Gene symbol		Unstressed			Stressed			Gene ontology: Biological process*
Homo sapiens	Danio rerio	L	Hyp	Tel	L	Hyp	Tel
CITED1	cited1							brain development
CITED2	cited2							brain development
FABP2	fabp2							triglyceride catabolic process
GSK3B	gsk3b							circadian rhythm
KLF11	klf11a							negative regulation of transcription
LDHA	ldha							positive regulation of apoptotic process
OLIG1	olig1							neuron fate commitment, regulation of transcription
PTPRR	ptprr							negative regulation of ERK1 and ERK2 cascade
PVALB	pvalb6							regulation of cytosolic calcium ion concentration
SIGMAR1	sigmar1							nervous system development, lipid transport
VEGFA	vegfab							angiogenesis, organogenesis
NRGN	nrgna							nervous system development, telencephalon development
ABCC1	abcc1							transport across blood-brain barrier
FKBP4	fkbp4							regulation of neuron development, steroid hormone receptor assembly
HSP90AA1	hsp90aa1.2							central nervous system neuron axonogenesis
LRP8	lrp8							cellular response to cholesterol
NDUFV1	ndufv1							mitochondrial respiratory chain complex I assembly
PCLO	pclob							pre-synapse to nucleus signaling pathway
SOD2	sod2							neuron development
SRRT	srrt							gene silencing by RNA
TEF	tefa							regulation of transcription
TOMM40	tomm40							transmembrane transport
TSPO2	tspo							intracellular cholesterol transport
BCL2L1	bcl2l1							neuron apoptotic process
CFP	si:ch73-237c6.1							immune response
CHRFAM7A	chrna7							cellular calcium ion homeostasis
GRM2	grm2a							regulation of synaptic transmission
PER1	per1b							regulation of circadian rhythm
PER1	per1a							regulation of circadian rhythm
TEF	tefb							positive regulation of transcription from RNA polymerase II promoter
ELOVL5	elovl5							sphingolipid biosynthetic process
KLF15	klf15							positive regulation of transcription from RNA polymerase II promoter
NR3C2	nr3c2							steroid hormone mediated signaling pathway
ADARB1	adarb1b							RNA processing, negative regulation of cell migration
ADARB2	adarb2							RNA processing
ARRB1	arrb1							regulation of ERK1 and ERK2 cascade
CDK5R1	cdk5r1a							brain development
CHRM2	chrm2a							nervous system development
CLOCK	clocka							regulation of circadian rhythm
CREM	crema							regulation of circadian rhythm
DRD1	drd1b							behavioral fear response, synaptic transmission
GABBR1	gabbr1a							gamma-aminobutyric acid signaling pathway
GRM3	grm3							regulation of synaptic transmission
HLF	hlfb							multicellular organism development
KLHL5	klhl5							protein ubiquitination
MAGI2	magi2b							positive regulation of neuron projection development
MAPK10	mapk10							regulation of circadian rhythm
NCAM1	ncam1a							regulation of synaptic plasticity
NCAN	CU861477.1							central nervous system development
NOTCH1	notch1b							axonogenesis
PEA15	pea15							DNA damage checkpoint
PHF21B	PHF21B							regulation of transcription
SLC2A1	slc2a1a							glucose transmembrane transport
SLC2A1	slc2a1b							glucose transmembrane transport
TBC1D9	tbc1d9							intracellular protein transport
TBC1D9B	tbc1d9							intracellular protein transport
THSD7A	thsd7ab							cell differentiation, angiogenesis
TNFAIP3	tnfaip3							immune response
TPPP	TPPP							microtubule bundle formation
VDR	vdrb							cellular calcium ion homeostasis
ZNF804A	znf804a							regulation of neuron projection development
AVPI1	si:ch211-197k17.3							activation of MAPK activity, cell cycle
CC2D1A	FO704915.1							positive regulation of I-kappaB kinase/NF-kappaB signaling
CIT	citb							nervous system development
CIT	cita							nervous system development
FGFR2	fgfr2							positive regulation of cell proliferation
GRIK3	GRIK3*							glutamate receptor signaling pathway
HDAC5	hdac5							chromatin silencing
KDR	kdr							positive regulation of cell proliferation
KLF12	klf12b							positive regulation of transcription from RNA polymerase II promoter
KLHL25	enc2							regulation of translational initiation
LRFN5	lrfn5a							chemical synaptic transmission, axonogenesis
NTRK2	ntrk2a							positive regulation of neuron projection development
QKI	qkib							positive regulation of gene expression, myelination
RAPGEF5	rapgef5a							nervous system development
SLC2A12	slc2a12							glucose transmembrane transport
SLC6A13	SLC6A13*							neurotransmitter transport
SOX9	sox9a							positive regulation of cell proliferation
TNFRSF4	tnfrsfa							immune response
SLC1A3	slc1a3b							neurotransmitter transport
Red: upregulation, Green: downregulation. L: larvae, Tel: telencephalon, Hyp: hypothalamus.
*Gene ontology is associated with Homo sapiens orthologs.

## Sheet: Supp8
Supplementary table 8. Life-long effect of developmental exposure to fluoxetine on similar cellular pathways in both stressed and unstressed conditions.
Canonical pathways	Unstressed			Stressed
	L	Hyp	Tel	L	Hyp	Tel
Aldosterone Signaling in Epithelial Cells	1.97	2.02	1.97		1.53	6.42
Androgen Signaling			3.26	1.58	1.32
Antioxidant Action of Vitamin C			1.47			1.6
Apelin Cardiomyocyte Signaling Pathway			1.68			1.85
CXCR4 Signaling		1.39	7.42		1.31
Calcium Signaling		2.57	2.98			1.98
Cancer Drug Resistance By Drug Efflux			1.96		1.35
Cardiac β-adrenergic Signaling			1.67			1.32
Chemokine Signaling			3.43		1.54
Cholecystokinin/Gastrin-mediated Signaling		2.09	5.7		1.69
Circadian Rhythm Signaling			1.9		4.67	2.51
D-myo-inositol (1,4,5,6)-Tetrakisphosphate Biosynthesis			2.24		1.32
D-myo-inositol (3,4,5,6)-tetrakisphosphate Biosynthesis			2.24		1.32
Dopamine-DARPP32 Feedback in cAMP Signaling		1.31	2.22			1.65
ERK5 Signaling			2		2.57
Endothelin-1 Signaling			2.28		1.43
Ephrin B Signaling			3.12		1.68
Ephrin Receptor Signaling			7.32		1.41
GNRH Signaling		2	8.74		1.58
GP6 Signaling Pathway		2.08				2.11
Glucocorticoid Receptor Signaling	2.43	1.55	2.43		1.49
Glycolysis I		2.72				1.35
HER-2 Signaling in Breast Cancer			2.35		1.39
JAK/Stat Signaling			3.43		1.45
Melatonin Signaling			1.9			1.3
Mitochondrial Dysfunction		1.58	2.77			1.61
NRF2-mediated Oxidative Stress Response	3.15	2.33	3.15		2.56	2.59
Neuropathic Pain Signaling In Dorsal Horn Neurons		2.33	3.91			1.59
Nitric Oxide Signaling in the Cardiovascular System		1.74				1.68
Oxidative Phosphorylation		1.45	1.71		1.42	1.62
Prolactin Signaling			3.89		1.36
RAR Activation			2.26		1.35
Reelin Signaling in Neurons			1.49	1.74
Relaxin Signaling			3.3		1.63
Role of Tissue Factor in Cancer			4.47		3.06
Synaptogenesis Signaling Pathway		3.33	7.37	1.81
Thrombopoietin Signaling			4.15		1.8
UVA-Induced MAPK Signaling			3.88		1.8
VEGF Family Ligand-Receptor Interactions			3.03		1.42
Wnt/Ca+ pathway			1.44	2.07
